# Supplementary material for: Dietary Protein Intake in Older Adults from Ethnic Minorities in the Netherlands, a Mixed Methods Approach
Source: MDPI journal article supplement (doi:10.3390/nu13010184), 2021-01-09
Supplement: s1 [file s1]

**Table S1. Most important protein food sources per ethnic group, based on the contribution to the total daily protein intake**

|    | <b>DUTCH ( N = 562 )</b> | <b>SOUTH ASIAN<br/>SURINAME ( N = 319 )</b> | <b>AFRICAN SURINAMESE<br/>( N = 373 )</b> | <b>TURKISH ( N = 61 )</b> | <b>MOROCCAN ( N = 100 )</b> |
|----|--------------------------|---------------------------------------------|-------------------------------------------|---------------------------|-----------------------------|
| 1  | Whole wheat bread        | Semi skimmed milk                           | Chicken meat                              | Lamb, mutton              | Moroccan bread              |
| 2  | Dutch cheese 40+         | Whole wheat bread                           | White rice                                | Turkish bread             | Whole wheat bread           |
| 3  | Semi skimmed milk        | White rice                                  | Dutch cheese 40+                          | Brown bread               | Lamb, mutton                |
| 4  | Brown bread              | Salted and dried cod                        | Whole wheat bread                         | Turkish wheat bread       | Chicken fillet              |
| 5  | Dutch cheese 20+         | Chicken                                     | Smoked chicken slices                     | Whole wheat bread         | Crustaceans                 |
| 6  | Chicken fillet           | Brown bread                                 | Salted and dried cod                      | Minced beef               | Semi skimmed milk           |
| 7  | Lean beef                | Sardines, mackerel,<br>salmon, eel, herring | Brown bread                               | Veal                      | Moroccan minced beef        |
| 8  | Boiled chicken egg       | Peanut butter                               | Nuts, peanuts                             | Boiled chicken egg        | Brown bread                 |
| 9  | Minced beef              | Dutch cheese 40+                            | Dutch cheese 20+                          | Turkish legumes soup      | Boiled chicken egg          |
| 10 | White pasta              | Surinamese legumes                          | Peanut butter                             | Legumes                   | Legumes                     |
